# Supplementary material for: ciRs-6 upregulates March1 to suppress bladder cancer growth by sponging miR-653
Source: publisher site journal article supplement (doi:10.18632/aging.102525), 2019-12-10
Supplement: Supplementary file [file aging-v11i23-102525-supplementary-material-SD1.pdf]

SUPPLEMENTARY FIGURES

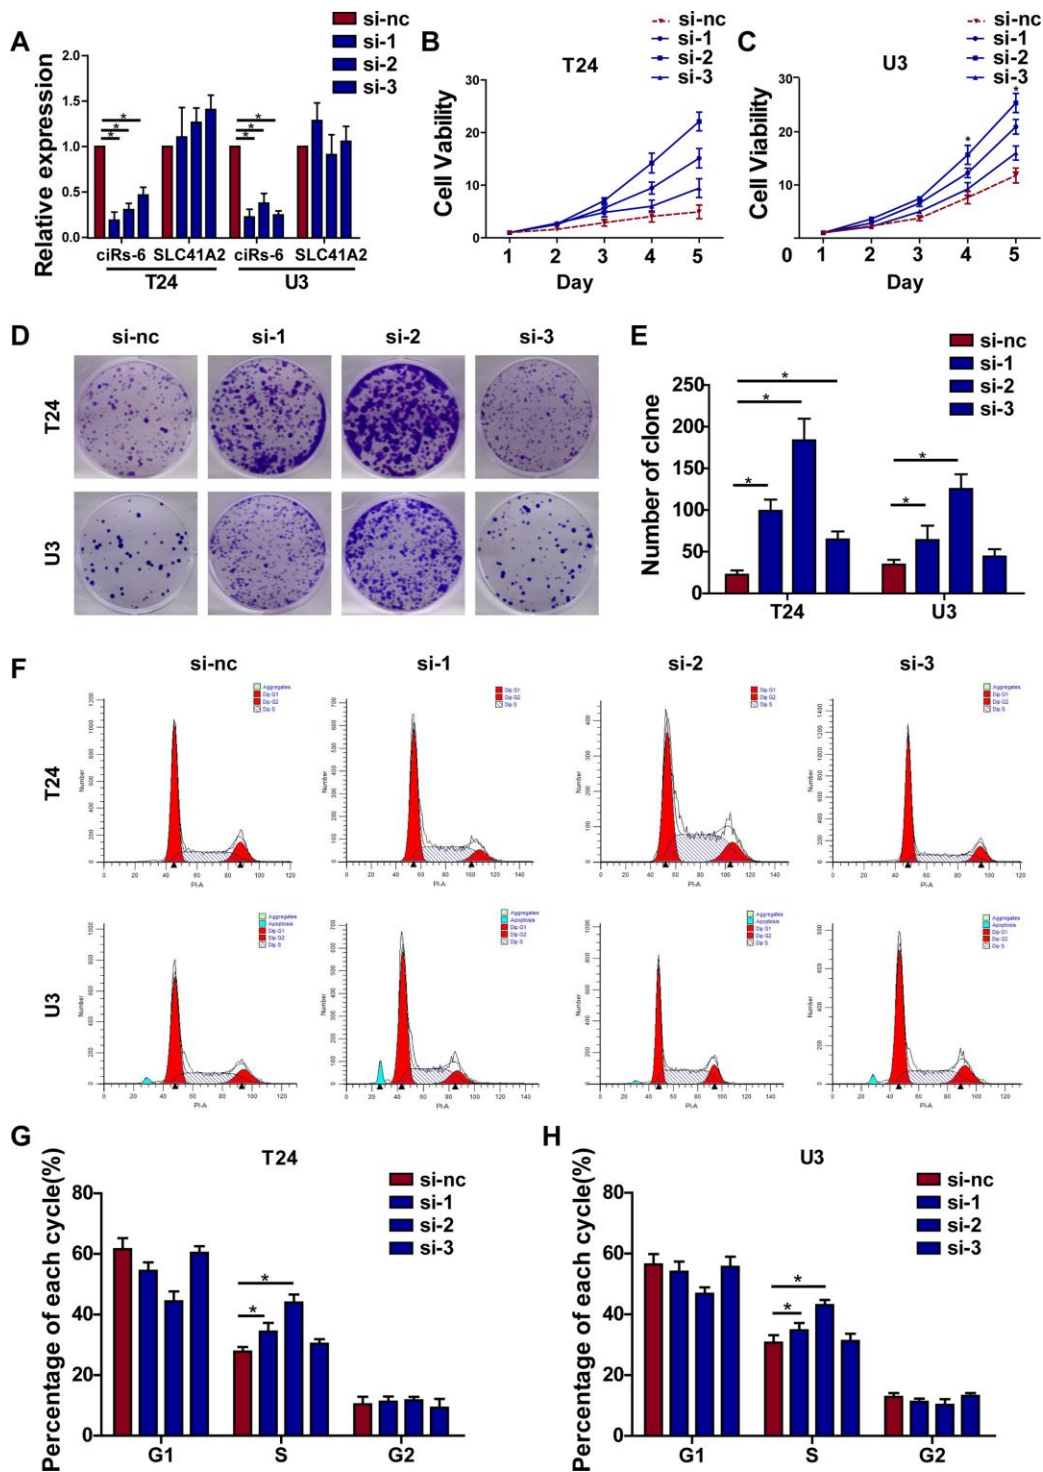

Supplementary Figure 1. silencing ciRs-6 promotes bladder cancer growth in vitro. (A) qPCR was used to detect the level of ciRs-6 and SLC41A2 after treating with siRNAs in bladder cancer cells; (B, C) CCK8 assay was performed to evaluate cell viability; (D, E) clone formation assay was used to evaluate clone forming ability; (F, G) S phase of cells were determined by cell cycle analysis. Results are displayed as mean±SEM, \*p<0.05, \*\*p<0.01.

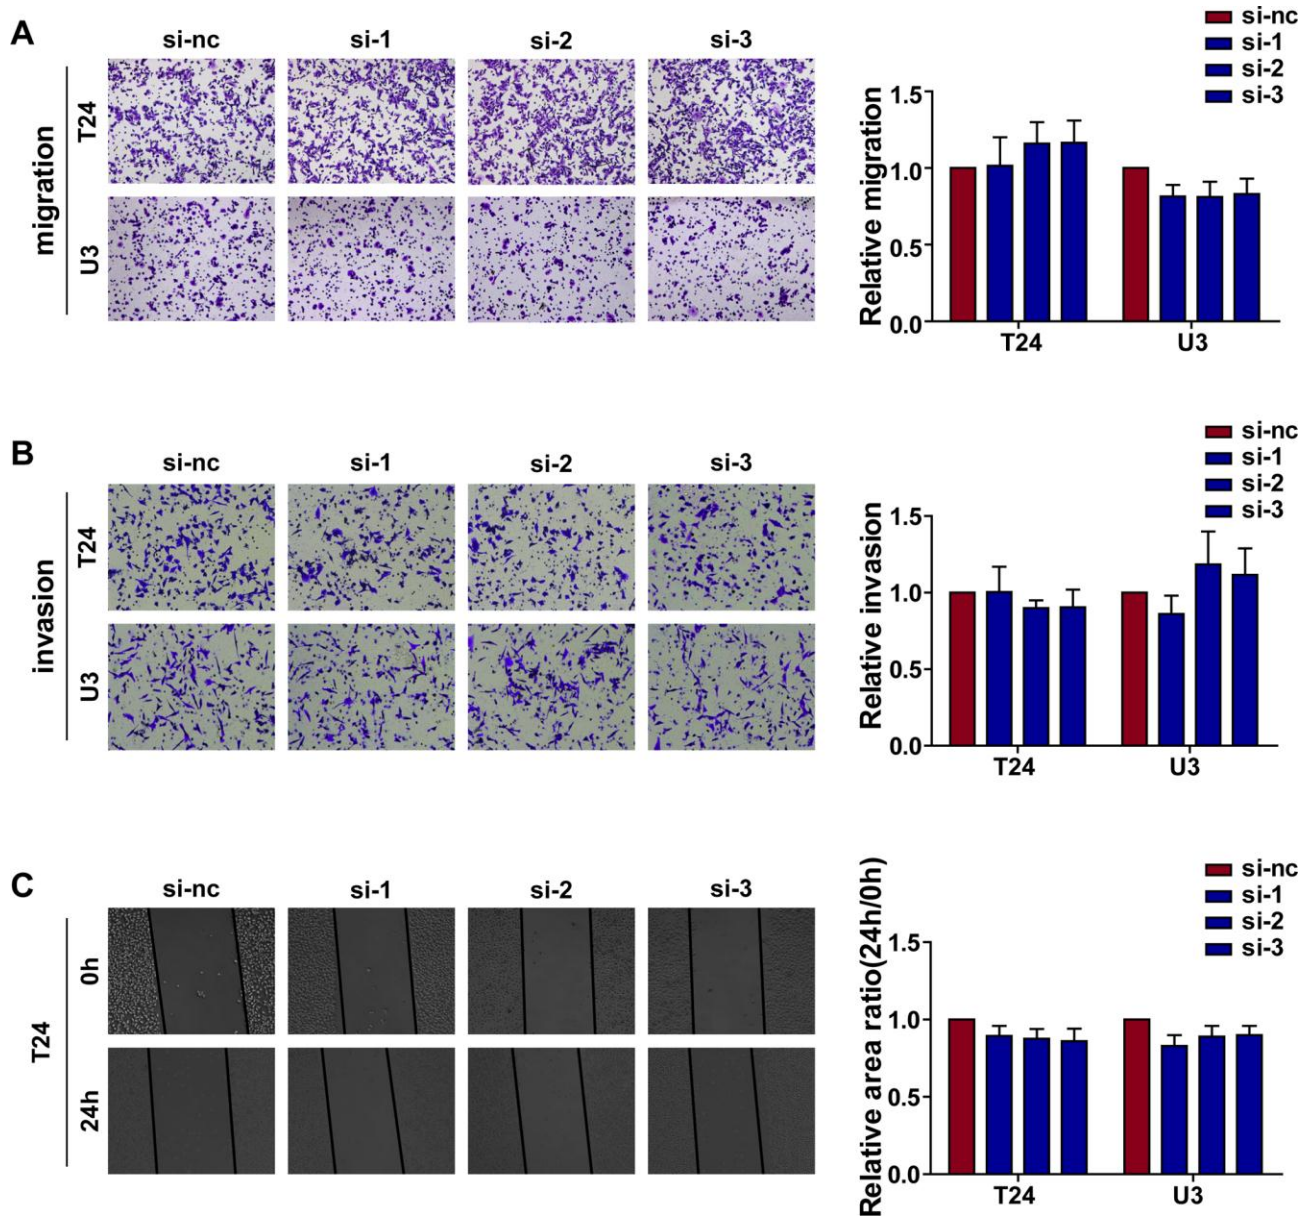

**Supplementary Figure 2. Silencing ciRs-6 leads less effect on bladder cancer cell metastasis in vitro.** Invasion and migration of bladder cancer cells was determined in vitro by (A, B) Trans-well assay; and (C) wound healing assay. Pictures were photographed by 200 $\times$ under light microscope. Results are displayed as mean $\pm$ SEM, \* $p$ <0.05, \*\* $p$ <0.01.

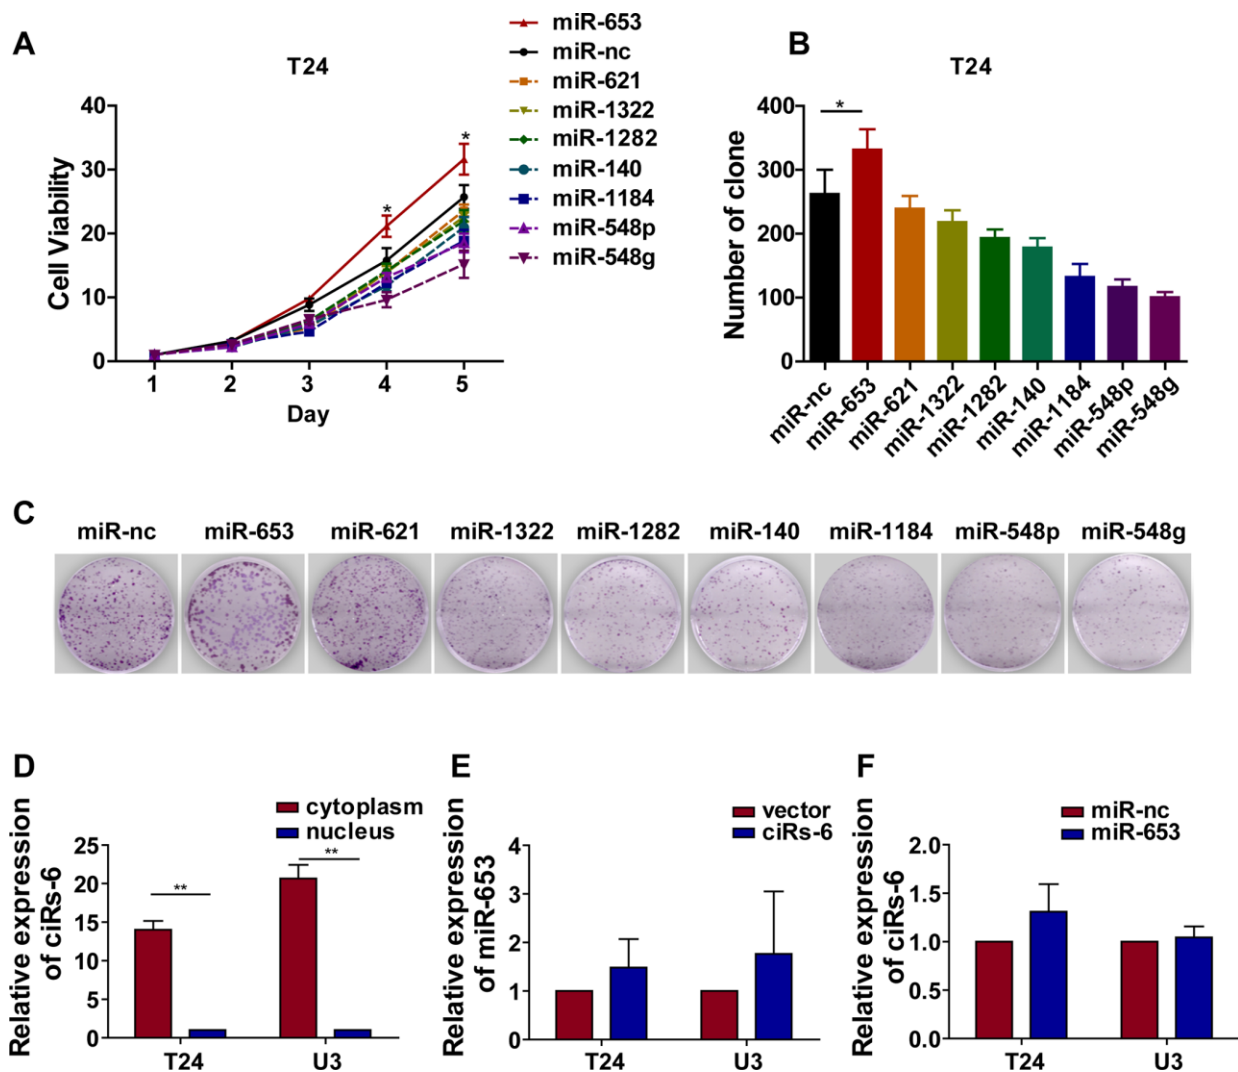

**Supplementary Figure 3. Effect of 8 miRNAs on cell growth in vitro.** (A) CCK8 assay used to detect the cell viability among each miRNA treating group; (B, C) showed different clone forming ability after miRNAs over-expression; (D) location of ciRs-6 in cells was determined by its different level in cytoplasm and nucleus; (E) expression of miR-653 was detected after ciRs-6 over-expression; (F) expression of ciRs-6 was detected after miR-653 over-expression. Results are displayed as mean±SEM, \*p<0.05, \*\*p<0.01.

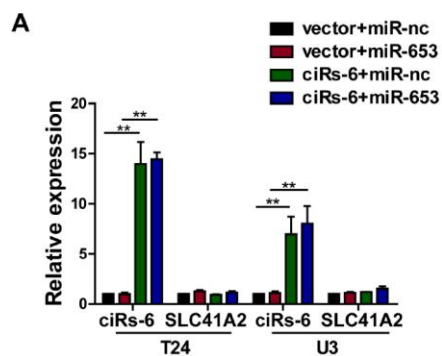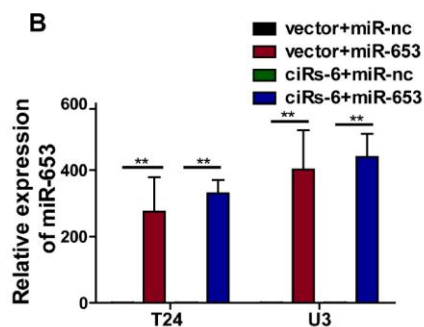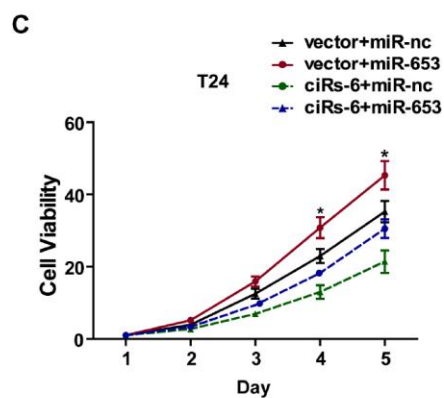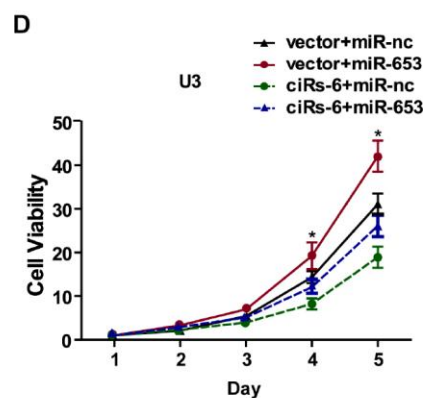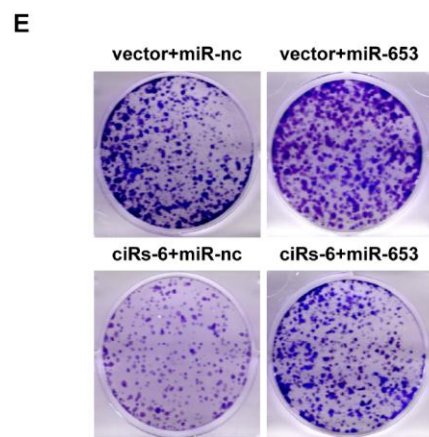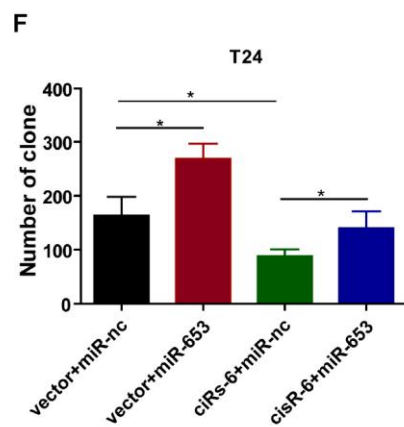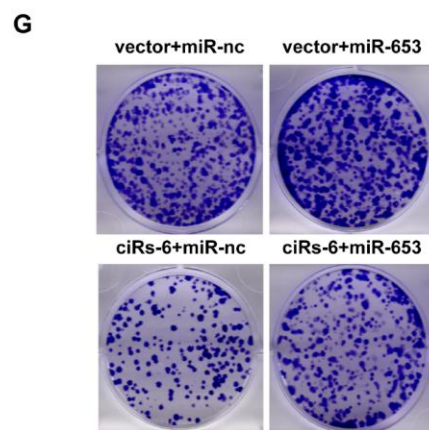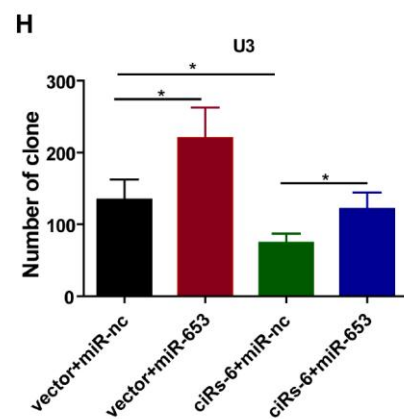



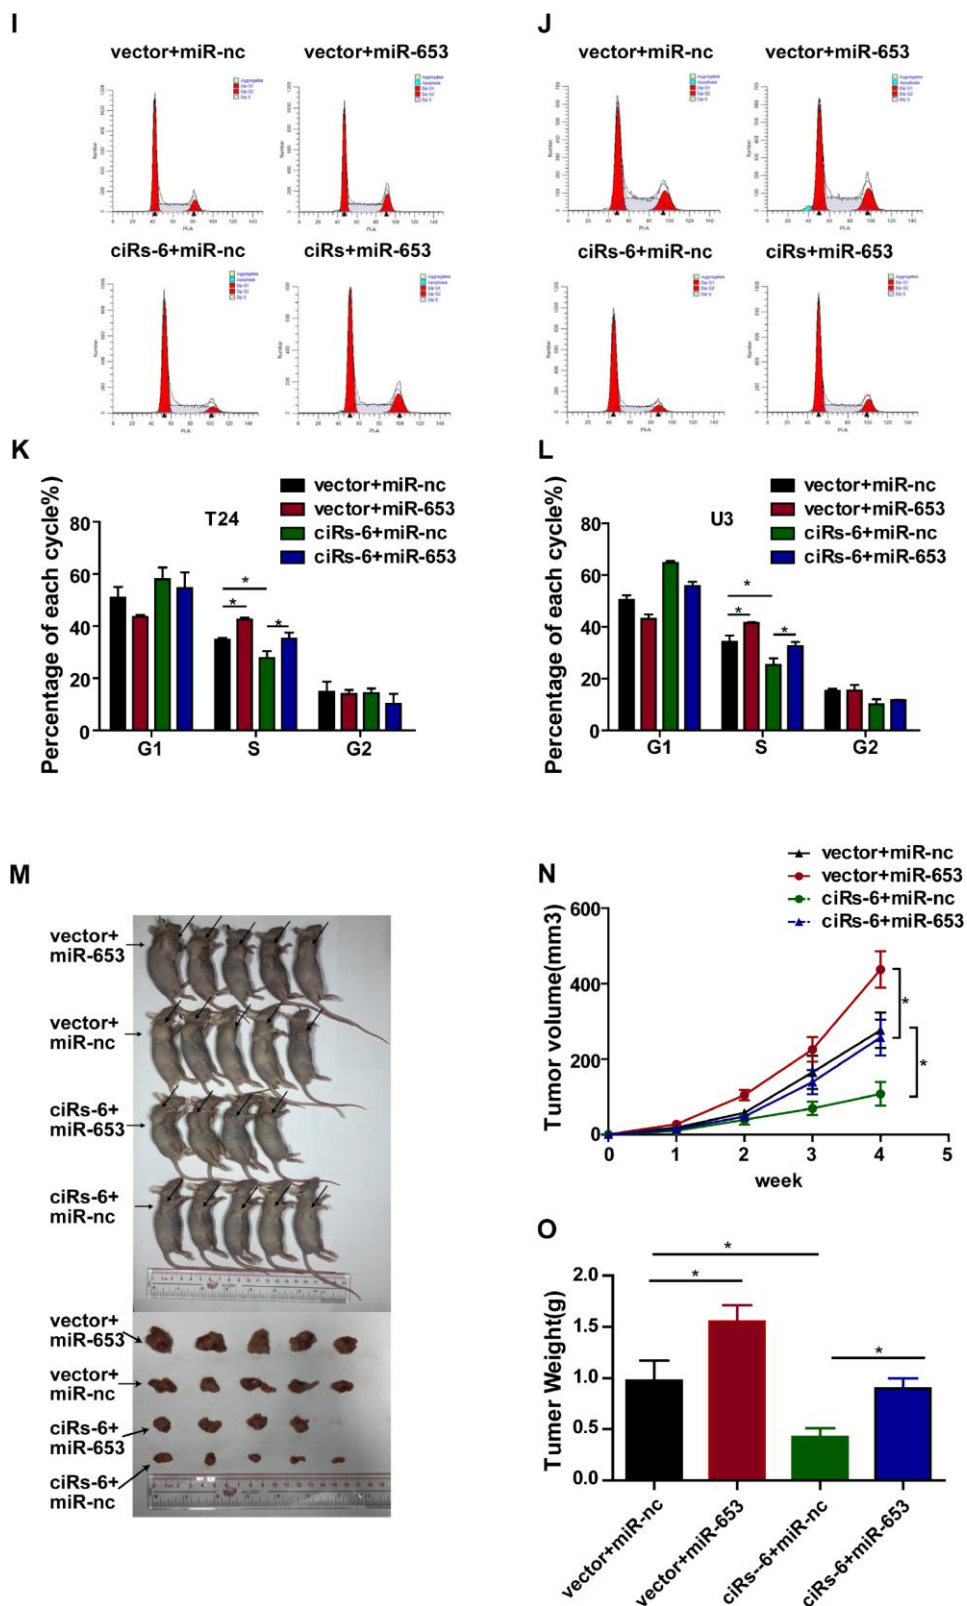

**Supplementary Figure 4. overexpressing March1 suppresses bladder cancer growth in vitro and in vivo.** (A) level of March1 was determined by qPCR; (B, C) CCK8 assay was performed to evaluate cell viability; (D, E) clone formation assay was used to evaluate the ability to form clones; (F–I) S phase of cells were determined by cell cycle analysis; (J–L) mice subcutaneous tumor model was involved to detect the suppressive role of March1 in tumor growth in vivo. Each group contains 5 mice. Results are displayed as mean±SEM, \*p<0.05, \*\*p<0.01.

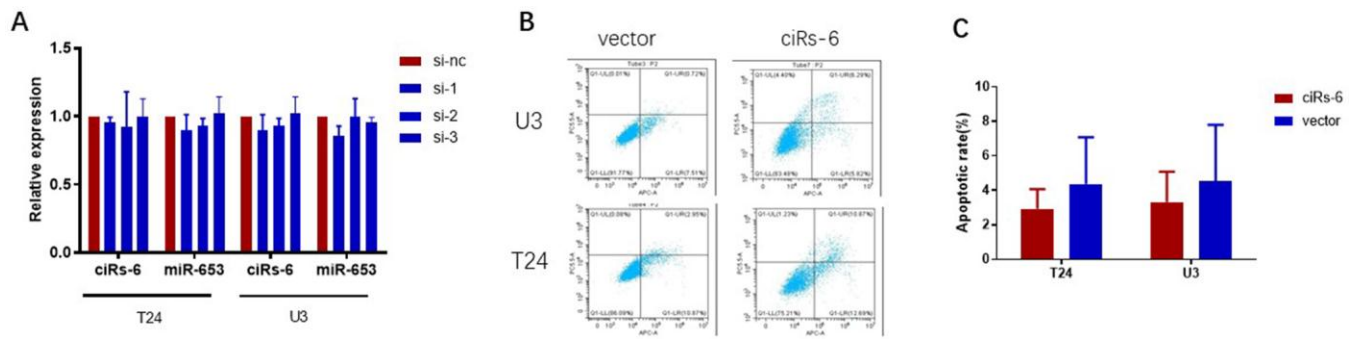

**Supplementary Figure 5. overexpressing March1 suppresses bladder cancer growth in vitro and in vivo.** (A) Expression of ciRs-6 and miR-653 were determined after March1 silence; (B, C) Annexin V/PI assay shown that over-expressing ciRs-6 in bladder cancer cells leads less effect on bladder cancer cell apoptosis. Results are displayed as mean±SEM, \* $p < 0.05$ , \*\* $p < 0.01$ .
