# Supplementary material for: ciRs-6 upregulates March1 to suppress bladder cancer growth by sponging miR-653
Source: publisher site journal article supplement (doi:10.18632/aging.102525), 2019-12-10
Supplement: Supplementary file [file aging-v11i23-102525-supplementary-material-SD2.pdf]

## SUPPLEMENTARY TABLES

**Supplementary Table 1. List of primers for qPCR.**

| Gene       | Sequence (5'-3')                                                                    |
|------------|-------------------------------------------------------------------------------------|
| ciRs-6     | F: CAGTTTCAGCTGGCATGGTA<br>R: TGAATCAGAACCGCACAAAC                                  |
| SLC41A2    | F: AATGGTTGGGGTTATCGTTG<br>R: TTCTTGTGGCTGGATGTTTG                                  |
| GAPDH      | F: TACTAGCGGTTTTACGGGCG<br>R: TCGAACAGGAGGAGCAGAGAGCGA                              |
| miR-653-5p | F: CTCAACTGGTGTTCGTGGAGTCGGCAATTCAGTTGAGCAGTAGAG<br>R: ACACTCCAGCTGGGGTGTGAAACAATCT |
| March1     | F: GTCTGTCCATCCACTCAGGAC<br>R: GGTTTGAGCTTGGTCTCCATT                                |
| U6         | F: CGCTTCGGCAGCACATATAC<br>R: TTCAGAATTTGCGTGCAT                                    |

**Supplementary Table 2. List of sequences for FISH probe.**

| Gene       | Sequence                                     |
|------------|----------------------------------------------|
| ciRs-6     | Cy3-GTTCCACAGAAGGACTGGATCTGTACTATATCCAGTACCA |
| miR-653-5p | Cy5-CAGATGAGATTGTTTCAACAC                    |
| 18S RNA    | Cy5-CTTCCTTGGATGTGGTAGCCGTTTC                |
| U6         | Cy5-TTTGCGTGCATCCTTGCG                       |

**Supplementary Table 3. List of siRNAs.**

| siRNA       | Sequence (5' -3')                                                |
|-------------|------------------------------------------------------------------|
| ciRs-6 si-1 | sense: UGGAUUAUAGUACAGAUCATT<br>antisense: UGGAUCUGUACUAUAUCCATT |
| ciRs-6 si-2 | sense: AUAGUACAGAUCAGUCCUTT<br>antisense: AGGACUGGAUCUGUACUAUTT  |
| ciRs-6 si-3 | sense: GUACAGAUCAGUCCUUCUTT<br>antisense: AGAAGGACTGGATCTGTACTT  |
| March1 si-1 | sense: CAGCCACGUUUGUUGAAUTT<br>antisense: AUUACAACAAACGUGGCUGTT  |
| March1 si-2 | sense: GAUGCCAAAUAUCUAACUTT<br>antisense: AGUUAGAUAAUUGGCAUCTT   |
| March1 si-3 | sense: CGUACAGUGUAAAGUCAUTT<br>antisense: AUAGACUUUACACUGUACGTT  |

**Supplementary Table 4. List of probe sequences for RNA pulldown.**

| <b>Gene</b>           | <b>Sequence (5'-3')</b>               |
|-----------------------|---------------------------------------|
| ciRs-6 (5'biotin)     | UCCACAGAAGGACUGGAUCUGUACUAUAUCCAGUACC |
| oligo                 | UUGUACUACACAAAAGUACUG                 |
| miR-653-5p (5'biotin) | GUGUUGAAACAAUCUCUACUG                 |
|                       | GUAGAGAUUGUUUCAACACUU                 |
| miR-nc (5'biotin)     | UUCUCCGAACGUGUCACGUTT                 |
|                       | ACGUGACACGUUCGGAGAATT                 |
